# Supplementary material for: Microbiome-mediated fructose depletion restricts murine gut colonization by vancomycin-resistant Enterococcus
Source: PubMed Central journal article supplement (PMC9748033; doi:10.1038/s41467-022-35380-5), 2022-12-13
Supplement: 41467_2022_35380_MOESM3_ESM.pdf [file 41467_2022_35380_MOESM3_ESM.pdf]

## **Description of Additional Supplementary Files**

### **SUPPLEMENTARY DATA FILES**

Supplementary\_Data\_File\_1.xlsx: Significant differences in the relative abundance of bacterial genera between untreated mice and mice that received antibiotics.

Supplementary\_Data\_File\_2.xlsx: Taxonomic classification and statistical analysis of the OTUs shown in Fig. 1C.

Supplementary\_Data\_File\_3.xlsx: Spearman correlation analysis between VRE faecal levels & relative abundance of bacterial genera identified in faeces.

Supplementary\_Data\_File\_4.xlsx: Statistics of the sequenced genomes of CBC isolates.

Supplementary\_Data\_File\_5.xlsx: Number of sequences analysed of each transcriptome from each mouse.

Supplementary\_Data\_File\_6.xlsx: Primers and constructions generated to obtain the fructokinase VRE mutants.

Supplementary\_Data\_File\_7.xlsx: Access codes for sequences generated in this study that have been deposited in public repositories.

Supplementary\_Data\_File\_8.xlsx: Additional KOs ( $>1\log_2FC$ ) whose expression was increased upon CBC administration.

Supplementary\_Data\_File\_9.xlsx: Tables containing the abundance of commensal bacteria identified through 16s rRNA sequencing in mice, the VRE colonization levels of antibiotic treated mice and bacterial gene expression levels of analyzed mice.
